# Supplementary material for: Soil moisture and precipitation intensity control the transit time distribution of quick flow in a flashy headwater catchment
Source: Copernicus journal article supplement (doi:10.5194/hess-2024-359), 2024-12-03
Supplement: Supplementary file [file hess-2024-359-RC2-supplement.pdf]

**[General Comments]:**

The manuscript “Soil moisture and precipitation intensity control the transit time distribution of quick flow in a flashy headwater catchment”(ID: hess-2024-359) mainly introduces the influences of both soil moisture and precipitation intensity on transit times, and highlights the rule of precipitation intensity in rapid mobilization of young water using the StorAge Selection (SAS) functions and measured stable isotope data. This work is interesting and significant for the solute-transport model and developing effective water management strategies. But some minor mistakes in this manuscript are found.

Therefore, the article, at current states, needs to be a minor revision, which may be worth publishing for this journal. The following is my comments for further improving the quality of this manuscript.

**[Specific comments]:**

- 1) The authors calculated the mean and maximum percentage of streamflow fractions for transit times  $T < 7$  days,  $T < 90$  days,  $7 < T < 90$  days, and  $90 < T < 365$  days. It is significance for transit times at watershed scales, can you attempt to analyze the rainfall-runoff event in hourly intervals with  $T < 1$  day? It is importance to understanding the flood hydrograph.
- 2) The saturated hydraulic conductivity  $K_s$  data should be added to understand the runoff generations.
- 3) The 4.5 Part-Implications and limitations should be concise.
- 4) The “conclusion” should be “Conclusions”?
